# Supplementary material for: Exploring early community exposure among first-year medical students in a peripheral Indonesian medical school: a qualitative case study
Source: Research Square preprint supplement (doi:10.21203/rs.3.rs-8386629/v1), 2026-01-22
Supplement: Supplementary file 1 [file 6e2d600d8d9a59303f498feb.docx]

**In-Depth Semi-Structured Interview Guide**

**Study Title**

Exploring early community exposure among first-year medical students in a peripheral Indonesian medical school: a qualitative case study

**Aim of the Interview**

The aim of this interview is to explore and gain an in-depth understanding of the experiences of first-year medical students at Universitas Borneo Tarakan in participating in early community exposure activities. This includes their perceptions, challenges encountered, and the perceived impact of the activities on skill development and learning motivation.

**Section 1: Opening**

**1. Introduction**

- The researcher introduces themselves and explains the purpose of the interview.
- The researcher explains how the information provided will be used and assures participants that data confidentiality will be maintained.

**2. Informed Consent**

- The researcher requests the participant’s consent to audio-record the interview.
- The researcher ensures that participants understand their right to withdraw from the interview at any time without consequences.

**Section 2: Students’ Perspectives**

**1. Perceptions and Attitudes**

- Participants are invited to share their general views on early community exposure activities.

**Question:**
Can you describe your views on the early community exposure activities?

- The researcher explores how participants perceive the benefits and relevance of these activities in their medical education.

**Question:**
How do you evaluate the benefits and relevance of these activities in your medical education?

**2. Evaluation of the Activities**

- Participants are asked to reflect on aspects they liked or disliked most about the activities.

**Question:**
In your opinion, what aspects of these activities did you like or dislike the most?

- The researcher explores how participation influenced participants’ views of the medical profession.

**Question:**
How did these activities influence your views of the medical profession?

**Section 3: Challenges and Barriers**

**1. Identification of Challenges**

- Participants are asked to describe challenges encountered during the early community exposure activities.

**Question:**
What challenges did you encounter while participating in the early community exposure activities?

- The researcher explores any logistical or adaptation-related difficulties experienced by participants.

**Question:**
Did you experience any logistical or adaptation-related challenges?

**2. Coping with Barriers**

- Participants are asked how they addressed or managed these challenges.

**Question:**
How did you cope with these challenges?

- The researcher explores whether participants received support from the university or peers.

**Question:**
Did you receive any support from the university or your peers?

**Section 4: Skill Development and Motivation**

**1. Impact on Skills**

- Participants are asked how the activities influenced their communication skills and empathy.

**Question:**
How did these activities influence your communication skills and sense of empathy?

- The researcher explores whether participants felt more confident interacting with the community after participating.

**Question:**
Did you feel more confident interacting with the community after participating in these activities?

**2. Motivation and Engagement**

- Participants are asked how the experience influenced their learning motivation.

**Question:**
How did this experience influence your motivation to learn?

- The researcher explores whether participation enhanced engagement in classroom learning.

**Question:**
Did participation in these activities increase your engagement in classroom learning?

**Section 5: Closing**

**1. Final Reflections**

- Participants are invited to share any additional thoughts regarding their experiences.

**Question:**
Is there anything else you would like to add regarding your experience in the early community exposure activities?

- Participants are asked to provide suggestions for future improvement of the activities.

**Question:**
Do you have any suggestions for improving these activities in the future?

**2. Appreciation**

- The researcher expresses gratitude for the participant’s time and contribution.
- The researcher explains the next steps of the study, if relevant.

**Additional Notes**

- The researcher ensures that the interview environment is comfortable and free from distractions.
- Probing techniques are used to obtain more in-depth information when appropriate.
- The researcher maintains neutrality and avoids influencing participants’ responses.
